1     **The effect of body mass index on smoking behaviour and nicotine metabolism: a Mendelian**  
2     **randomization study**

3     Amy E. Taylor<sup>1,2</sup>, Rebecca C. Richmond<sup>1,3</sup>, Teemu Palviainen<sup>4</sup>, Anu Loukola<sup>4</sup>, Jaakko Kaprio<sup>4,5</sup>, Caroline  
4     Relton<sup>1,3</sup>, George Davey Smith<sup>1,3</sup>, Marcus R. Munafò<sup>3,6</sup>

5

6         1. Population Health Sciences, Bristol Medical School, University of Bristol, Bristol, United  
7         Kingdom.

8         2. NIHR Biomedical Research Centre at the University Hospitals Bristol NHS Foundation Trust  
9         and the University of Bristol, United Kingdom.

10        3. MRC Integrative Epidemiology Unit at the University of Bristol, Bristol, United Kingdom.

11        4. Institute for Molecular Medicine FIMM, Helsinki Institute for Life Science, University of  
12        Helsinki, Helsinki, Finland

13        5. Department of Public Health, Medical Faculty, University of Helsinki, Helsinki, Finland

14        6. UK Centre for Tobacco and Alcohol Studies, School of Experimental Psychology, University of  
15        Bristol, Bristol, United Kingdom.

16

17     Short title: The effect of BMI on smoking behaviour

18     Key words: Body mass index, smoking, ALSPAC, Mendelian Randomisation

19

## 20 **Abstract**

## 21 **Background**

22 Given clear evidence that smoking lowers weight, it is possible that individuals with higher body  
23 mass index (BMI) smoke in order to lose or maintain their weight.

## 24 **Methods and Findings**

25 We undertook Mendelian randomization analyses using 97 genetic variants associated with BMI. We  
26 performed two sample Mendelian randomization analyses of the effects of BMI on smoking  
27 behaviour in UK Biobank (N=335,921) and the Tobacco and Genetics consortium genomewide  
28 association study (GWAS) (N≤74,035) respectively, and two sample Mendelian randomization  
29 analyses of the effects of BMI on cotinine levels (N≤4,548) and nicotine metabolite ratio (N≤1,518) in  
30 published GWAS, and smoking-related DNA methylation in the Avon Longitudinal Study of Parents  
31 and Children (N≤846).

32 In inverse variance weighted Mendelian randomization analysis, there was evidence that higher BMI  
33 was causally associated with smoking initiation (OR for ever vs never smoking per one SD increase in  
34 BMI: 1.19, 95% CI: 1.11 to 1.27) and smoking heaviness (1.45 additional cigarettes smoked per day  
35 per SD increase in BMI, 95% CI: 1.03 to 1.86), but little evidence for a causal effect with smoking  
36 cessation. Results were broadly similar using pleiotropy robust methods (MR-Egger, median and  
37 weighted mode regression). These results were supported by evidence for a causal effect of BMI on  
38 DNA methylation at the aryl-hydrocarbon receptor repressor (*AHRR*) locus. There was no strong  
39 evidence that BMI was causally associated with cotinine, but suggestive evidence for a causal  
40 negative association with the nicotine metabolite ratio.

## 41 **Conclusions**

42 There is a causal bidirectional association between BMI and smoking, but the relationship is likely to  
43 be complex due to opposing effects on behaviour and metabolism. It may be useful to consider BMI

44 and smoking together when designing prevention strategies to minimise the effects of these risk

45 factors on health outcomes.

46

## 47 Introduction

48 Smoking and obesity are amongst the leading preventable causes of mortality and morbidity  
49 worldwide [1]. Understanding pathways which contribute to these risk factors, and the nature of the  
50 relationship between them, is therefore of paramount importance for disease prevention.  
51 Observationally, current smoking is often associated with lower body mass index [2]. However,  
52 heavy smoking has been found to be associated with higher body mass index (BMI) [2, 3]. Given the  
53 clustering of unhealthy behaviours such as smoking, low physical activity and poor diet [4], and the  
54 strong links between smoking, obesity and sociodemographic factors [5], establishing the existence  
55 of and direction of causality is difficult.

56 Mendelian randomisation (MR), which uses genetic variants associated with exposures as proxies,  
57 can help to overcome problems of confounding and reverse causality because, in theory, genetic  
58 variants associated with the exposure of interest should be inherited independently of other genetic  
59 variants and environmental factors [6]. There is good evidence from MR studies, using a genetic  
60 variant that influences the number of cigarettes consumed per day among smokers, that heavier  
61 smoking causes a reduction in body mass index and other measures of adiposity [7-9]. This may be  
62 explained by nicotine increasing metabolic rate and/or lowering appetite and therefore changing  
63 energy balance [2]. To support this, there is a large body of evidence showing that smoking cessation  
64 is accompanied by weight gain [10-15], though with large individual variation in the amount gained.

65 Given that smoking lowers body weight, it is plausible that the association between BMI and  
66 smoking is bidirectional; that is more overweight individuals may take up smoking, smoke more  
67 heavily, or continue to smoke rather than quit, in order to lower weight. Weight gain is commonly  
68 cited as a concern for smokers who are considering quitting smoking [10]. This has been found most  
69 consistently in women [10], although there is also evidence that weight concern is associated with  
70 motivation to quit smoking in men [16]. Weight concern or body dissatisfaction amongst adolescents  
71 may also increase the likelihood of smoking initiation [17, 18]. However, it is important to note that

72 the relationship between weight concern and BMI is complex; for example, it may be U-shaped in  
73 males [19]. Amongst young people in the Avon Longitudinal Study of Parents and Children (ALSPAC),  
74 higher BMI was associated with smoking initiation in females, but not in males, whereas body  
75 dissatisfaction was associated with higher risk of smoking initiation in both sexes [20]. Smoking and  
76 obesity are also both associated with increased risk of anxiety and depression [21] and there is  
77 evidence that the link between higher BMI and depressive symptoms is causal [22]. Therefore, it is  
78 possible that BMI could lead to smoking through its effects on mental health, although strong  
79 evidence of causality between mental health and smoking is yet to be established.

80 In addition to behavioural links, it is possible that BMI could alter smoking behaviour via  
81 physiological effects. Higher BMI could result in lower blood nicotine levels for the same amount  
82 smoked, due to higher total blood volume or absorption of nicotine or its metabolites by fatty tissue  
83 [23]. It has been demonstrated that BMI is negatively correlated with nicotine levels following  
84 administration of nicotine replacement therapy [24]. This could mean that individuals with higher  
85 BMI would need to smoke more in order to experience the same effect of nicotine. BMI may also  
86 affect nicotine metabolism, which is commonly measured by the nicotine metabolite ratio (NMR).  
87 Studies have shown that individuals with higher NMR (reflecting faster metabolism of nicotine)  
88 smoke more heavily and are less likely to give up smoking [25, 26]. Observationally, BMI tends to be  
89 negatively correlated with NMR [27]. This could plausibly be because NMR lowers BMI through its  
90 effect on increasing smoking, although it has been argued that evidence points towards the  
91 relationship being in the opposite direction, from BMI to NMR [27].

92 A previous genetic analysis demonstrated that higher genetically determined BMI was associated  
93 with increased likelihood of smoking initiation and higher tobacco consumption [28]. This was  
94 interpreted by the authors as shared genetic aetiology for BMI and smoking rather than a causal  
95 effect of BMI on smoking. For example, variants in the brain derived neurotrophic factor (*BDNF*)  
96 gene associate with both BMI and smoking initiation at genomewide significance level [29, 30]. We

sought to extend this work and explore the potential causal effect of BMI on smoking using a larger number of genetic variants and Mendelian randomisation methods which are more robust to potential pleiotropy [31-33]. Using genetic variants associated with BMI from the largest published GWAS of BMI to date [30], we investigated whether BMI causes differences in smoking behaviour and total tobacco exposure, by looking at both self-reported measures of smoking and biological measures of exposure (cotinine and DNA methylation). We also used this approach to investigate whether BMI causally influences NMR. We performed analyses using several datasets: the Tobacco and Genetics Consortium GWAS [29], the Cotinine Consortium GWAS [34] and the largest NMR GWAS conducted to date [35], the UK Biobank [36] and ALSPAC [37].

## 116 **Methods**

117 We performed two sample Mendelian randomisation using summary data from GWAS and  
118 individual level data from the UK Biobank.

## 119 **Study samples**

### 120 **GWAS summary data: BMI**

121 We obtained summary data on the association of genetic variants with BMI from the most recent  
122 GIANT BMI GWAS [30]. We used the 97 independent SNPs identified as reaching genome-wide  
123 significance with BMI. Associations between genetic variants and BMI (betas and standard errors)  
124 were obtained from the meta-analysis of the European sex-combined datasets ( $N \leq 322,135$ ) [30]. A  
125 full list of SNPs used in each analysis is shown in Supplementary Table S1.

### 126 **GWAS summary data: smoking related outcomes**

127 We obtained estimates (beta coefficients/odds ratios and standard errors) of the association of BMI-  
128 related genetic variants with smoking initiation (ever vs never smoking) ( $N \leq 74,035$ ), age of  
129 initiation ( $N \leq 24,114$ ), smoking cessation (former vs current smoking) ( $N \leq 41,278$ ) and smoking  
130 heaviness amongst ever smokers (cigarettes smoked per day) ( $N \leq 38,101$ ) from the Tobacco and  
131 Genetics (TAG) consortium GWAS [29]. We looked up associations of BMI-related SNPs with cotinine  
132 in summary data from a published GWAS of cotinine levels in current daily cigarette smokers ( $N \leq$   
133 4,548) [34] and with the NMR in summary data from a GWAS in cotinine-verified current smokers  
134 [35]. Summary statistics for the NMR GWAS not adjusted for BMI were obtained from the study  
135 authors separately for the Finnish Twin Study (FinnTwin), the Young Finns Study (YFS) and the  
136 National FINRISK study.

### 137 **GWAS summary data: DNA methylation**

We performed genome-wide association analysis of DNA methylation at the aryl-hydrocarbon receptor repressor (*AHRR*) methylation site cg05575921 (the strongest smoking-associated methylation locus identified to date [38]) in the Avon Longitudinal Study of Parents and Children (ALSPAC) ARIES resource [39]. ALSPAC is a longitudinal birth cohort, which recruited 14,541 pregnant women with due dates between 1 April 1991 and 31 December 1992. Information on these women and their children has been collected at clinics and via questionnaires ever since [37, 40]. Please note that the study website contains details of all the data that is available through a fully searchable data dictionary (<http://www.bris.ac.uk/alspac/researchers/data-access/data-dictionary/>). Ethical approval for the study was obtained from the ALSPAC Ethics and Law Committee and the Local Research Ethics Committees. The ARIES resource includes 1,018 mother offspring pairs. DNA methylation in the mothers was assessed from blood samples taken at two timepoints: during pregnancy and ~18 years later. Genome-wide DNA methylation profiling in ARIES was performed using the Illumina Infinium HumanMethylation450 BeadChip (450K) array [39]. Full details of the GWAS methods are provided in supplementary material. The sample used in the GWAS ( $N \leq 846$ ) included smokers and non-smokers. Beta coefficients and standard errors of the association with methylation for each of the BMI-related SNPs were obtained from the GWAS summary statistics.

#### **UK Biobank**

We also used data on individuals from the UK Biobank, which recruited over 500,000 individuals (aged between 40 and 70 years) in the UK [41]. Individuals attended assessment centres between 2006-2010, where they completed a questionnaire on lifestyle factors and had blood samples and measurements taken. Individuals were classified as ever smokers if they had smoked more than 100 cigarettes in their lifetime and current smokers if they indicated that they were still smoking. Cigarettes smoked per day amongst current smokers and past regular smokers was reported on a continuous scale. BMI was calculated as  $\text{weight}(\text{kg})/\text{height}(\text{m})^2$ . In this analysis, we included unrelated individuals of white British ancestry ( $N=335,921$ ) (see supplementary material for details).



## Statistical analysis

In two-sample Mendelian Randomisation analysis, we calculated the ratio of the SNP-outcome and SNP-exposure associations (the Wald estimator) for each of the 97 BMI-related SNPs (see Supplementary Table S1), to give an estimate of the effect of BMI on the outcome. Where BMI-related SNPs were not available in the outcome GWAS, proxy SNPs (with an R-squared value of > 0.9 with the original SNP) were used if available. The single SNP estimates were combined in an inverse variance weighted (IVW) random effects meta-analysis, as outlined by Burgess and colleagues [42], using the mrrobust package in Stata [43]. For the analysis of smoking initiation, we excluded the genetic variant in *BDNF*, as this locus is likely to be pleiotropic and is associated with smoking initiation at genome-wide significance level [29].

Within UK Biobank, we generated a weighted BMI genetic risk score from dosage scores of the 97 SNPs, using the weights from the combined ancestries GIANT analysis [30] and tested the association of the standardised risk score against measured BMI using linear regression. We calculated associations of each SNP with smoking behaviour phenotypes using logistic or linear regression, adjusted for 10 principal genetic components, and produced causal estimates using the same two sample MR IVW method as outlined above. We performed primary analyses in the full sample, but also stratified by sex, given evidence from previous literature that the relationship between weight concern and smoking might be stronger in females. Results from TAG and UK Biobank were meta-analysed using inverse variance weighted fixed effects meta-analysis.

We also performed analyses which are more robust to potential pleiotropy, MR Egger [31], weighted median regression [32] and the mode based estimator [33]. The MR Egger method is similar to IVW, but allows the intercept of the regression line to change. The intercept is a test of directional pleiotropy; if the intercept differs from zero, this indicates that there is directional pleiotropy. The slope obtained from MR Egger is an estimate of the causal effect after taking into account this directional pleiotropy [31]. Weighted median regression generates a consistent estimate of a causal

188 effect even when up to 50% of SNPs are invalid instruments [32]. The mode based estimator method  
 189 assumes that the most commonly occurring causal effect estimate is a consistent estimate of the  
 190 true causal effect [33].

191 In addition, we attempted to replicate previous analyses investigating the causal effect of smoking  
 192 on BMI [7], using the rs16969968 functional variant in the *CHRNA3-A5-B4* gene cluster, which  
 193 increases smoking heaviness (cigarettes smoked per day) amongst smokers [44]. We regressed the  
 194 rs16969968 SNP on BMI in never, former and current smokers, adjusting for age, sex and principal  
 195 components in UK Biobank.

196 All analyses were conducted in Stata (version 14.1).

197

## Results

### Association of BMI genetic risk score with BMI

Within UK Biobank, each SD increase in genetic risk score was associated with a 0.64kg/m<sup>2</sup> increase in BMI (95% CI: 0.62 to 0.65). There was evidence that the association of the BMI genetic risk differed by smoking status ( $p$  for heterogeneity  $\leq 0.001$ ), with the strongest association seen in current smokers (Figure S1).

### MR analysis of effect of BMI on self-reported smoking behaviours

There was evidence that BMI was causally associated with increased likelihood of smoking initiation (Figure 1A and Supplementary Tables S1 and S2). In IVW Mendelian randomisation analysis combining the TAG and UK Biobank results, a one SD increase in BMI increased the odds of being an ever rather than a never smoker by 19% (OR: 1.19, 95% CI: 1.11 to 1.27). Findings from weighted median, MR Egger and mode weighted regression were consistent with a positive association with smoking initiation, although magnitudes of association were lower in median and weighted mode regression. In MR Egger analysis, there was no clear evidence for directional pleiotropy.

We also found some evidence for a causal effect of higher BMI on smoking heaviness within smokers (Figure 1C). In IVW analysis, each SD increase in BMI increased smoking heaviness by 1.45 (95% CI: 1.03 to 1.86) additional cigarettes per day. Estimates of these associations were similar for median and weighted mode regression. However, the combined estimate from MR Egger was not consistent with the findings from IVW ( $\beta = 0.04$ , 95% CI -0.94, 1.03).

A one SD increase in BMI was associated with a -0.01 log unit decrease in age at initiation (95% CI: -0.02 to 0.0003) in IVW analysis. Results from the other analytical approaches were consistent with this effect but were imprecise (Figure 1D). There was no clear evidence using any of the approaches for a causal effect of BMI on smoking cessation (Figure 1B).

221 **Figure 1. Association between BMI genetic risk score and smoking phenotypes in TAG and UK Biobank**

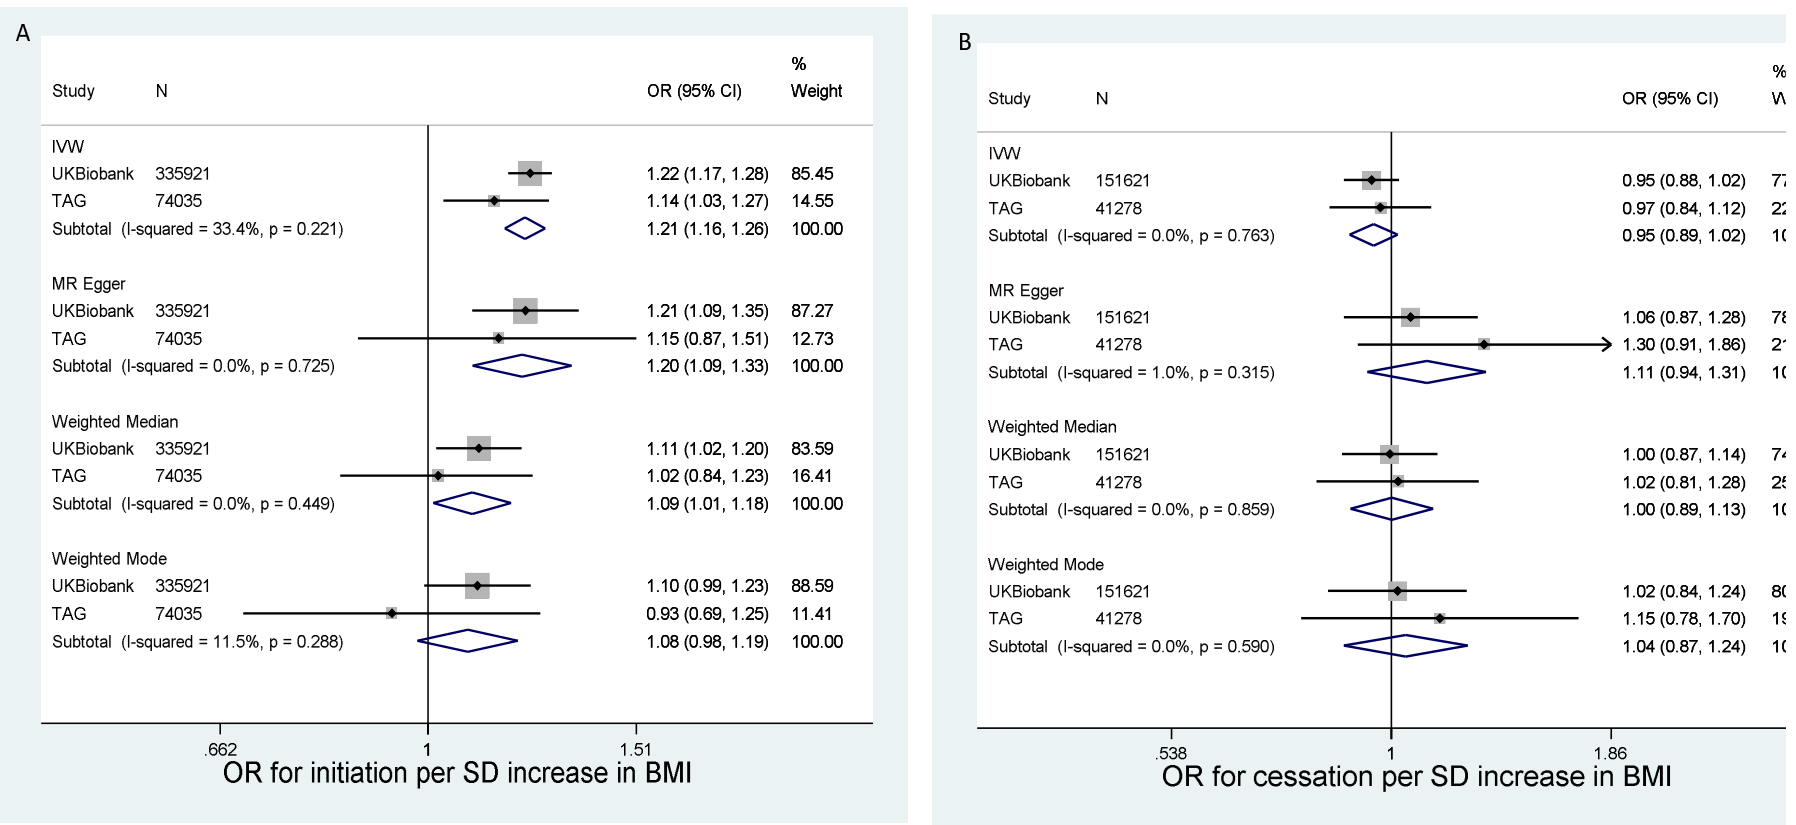

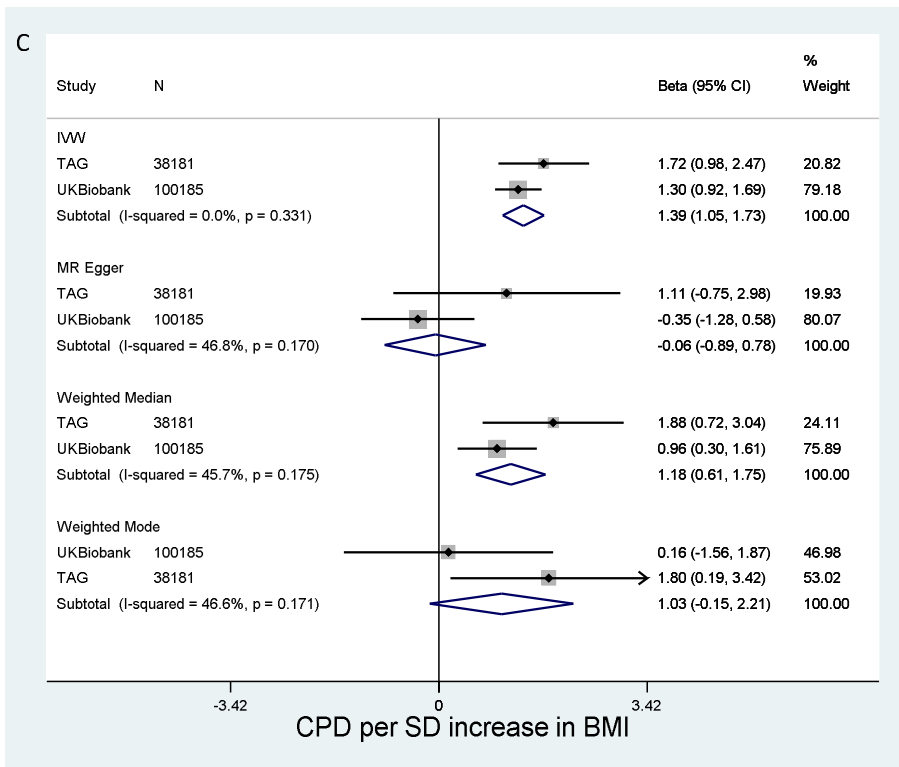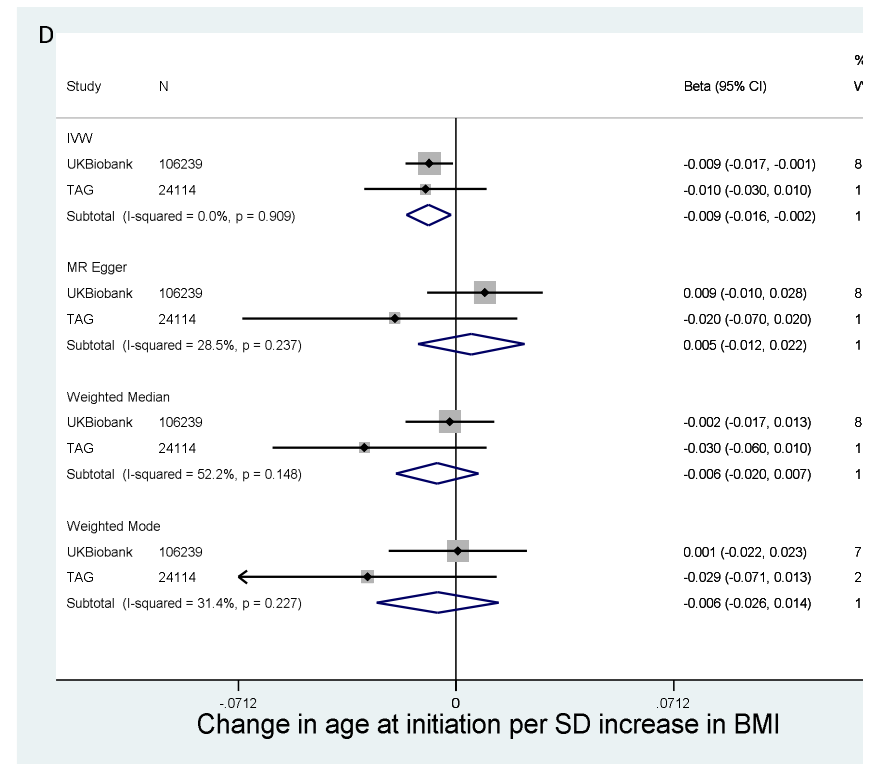

D. Age at initiation in log units.

Results were similar for males and females in UK Biobank (p-values for heterogeneity in comparisons of IVW analyses all >0.6) (Tables S3 and S4).

#### **MR analysis of effect of BMI on DNA methylation**

In the ALSPAC mothers, DNA methylation at *AHRR* was negatively associated with being a smoker and with cigarettes per day (Supplementary Table S5).

There was evidence for a causal effect of BMI on *AHRR* DNA methylation in the ALSPAC mothers in ARIES (Table 1). In IVW Mendelian randomisation analysis, a one SD increase in BMI decreased *AHRR* DNA methylation by 0.33 SD (95% CI: -0.55 to -0.11) in samples taken ~18 years post pregnancy and by 0.23 SD (95% CI: -0.47 to 0.01) in the antenatal samples. Evidence from the pleiotropy robust methods were consistent with the results from IVW analysis, but evidence for associations in the antenatal samples was weak using these approaches.

#### **MR analysis of effect of BMI on cotinine**

Using data from the cotinine GWAS, we found no clear evidence for a causal effect of BMI on cotinine levels (beta from IVW: 0.05 SD, 95% CI: -0.13 to 0.23) (Table 2).

#### **MR analysis of effect of BMI on nicotine metabolite ratio**

Across the FinnTwin, FINRISK and YFS studies, there was suggestive evidence that higher BMI was associated with lower NMR ( -0.47 per SD increased in BMI, 95% CI: -0.78, -0.12 in IVW analysis). The magnitude of association was consistent across the other approaches; however, there was a large amount of heterogeneity between the studies for weighted median and weighted mode analyses. Clear evidence for a negative association between BMI and NMR was only seen in the FinnTwin study (Supplementary Table S6).

**Table 1. Two sample MR of causal effect of BMI on *AHRR* methylation (cg05575921) in ARIES (N=up to 846)**

|                            | Follow-up methylation (mean age 47 years) |       | Antenatal methylation (mean age 29 years) |      |
|----------------------------|-------------------------------------------|-------|-------------------------------------------|------|
|                            | Beta (95% CI)                             | P     | Beta (95% CI)                             | P    |
| Inverse variance weighted  | -0.33 (-0.55, -0.11)                      | 0.004 | -0.23 (-0.47, 0.01)                       | 0.06 |
| MR Egger slope             | -0.72 (-1.25, -0.19)                      | 0.008 | -0.33 (-0.92, 0.25)                       | 0.26 |
| MR Egger Intercept         | 0.01 (-0.003, 0.025)                      | 0.11  | 0.003 (-0.01, 0.02)                       | 0.70 |
| Weighted median regression | -0.39 (-0.75, -0.02)                      | 0.04  | -0.12 (-0.51, 0.26)                       | 0.53 |
| Weighted mode regression   | -0.54 (-1.00, -0.08)                      | 0.02  | -0.19 (-0.68, 0.31)                       | 0.46 |

96 SNPs from Locke et al. GWAS. Coefficients represent SD change in methylation per SD change in BMI, adjusted for age, PCs, cell counts, batch.

258 **Table 2. Two sample MR of causal effect of BMI on cotinine (N=up to 4,548)**

|                            | Cotinine (SD)          |      |
|----------------------------|------------------------|------|
|                            | Beta (95% CI)          | P    |
| Inverse variance weighted  | 0.05 (-0.13, 0.23)     | 0.62 |
| MR Egger slope             | 0.02 (-0.41, 0.46)     | 0.91 |
| MR Egger Intercept         | 0.001 (-0.01, 0.01)    | 0.92 |
| Weighted median regression | 0.03 (-0.26, 0.32)     | 0.84 |
| Weighted mode regression   | -0.005 (-0.370, 0.360) | 0.98 |

259 Using 95 SNPs from Locke et al. GWAS. Coefficients represents SD change in cotinine per SD change in BMI. I-squared for heterogeneity in IVW analysis:

260 0%, p-value=0.87

261

262

263

264

265



266 **Figure 2. Two sample MR of effect of BMI on NMR in FinnTwin, FINRISK and YFS**

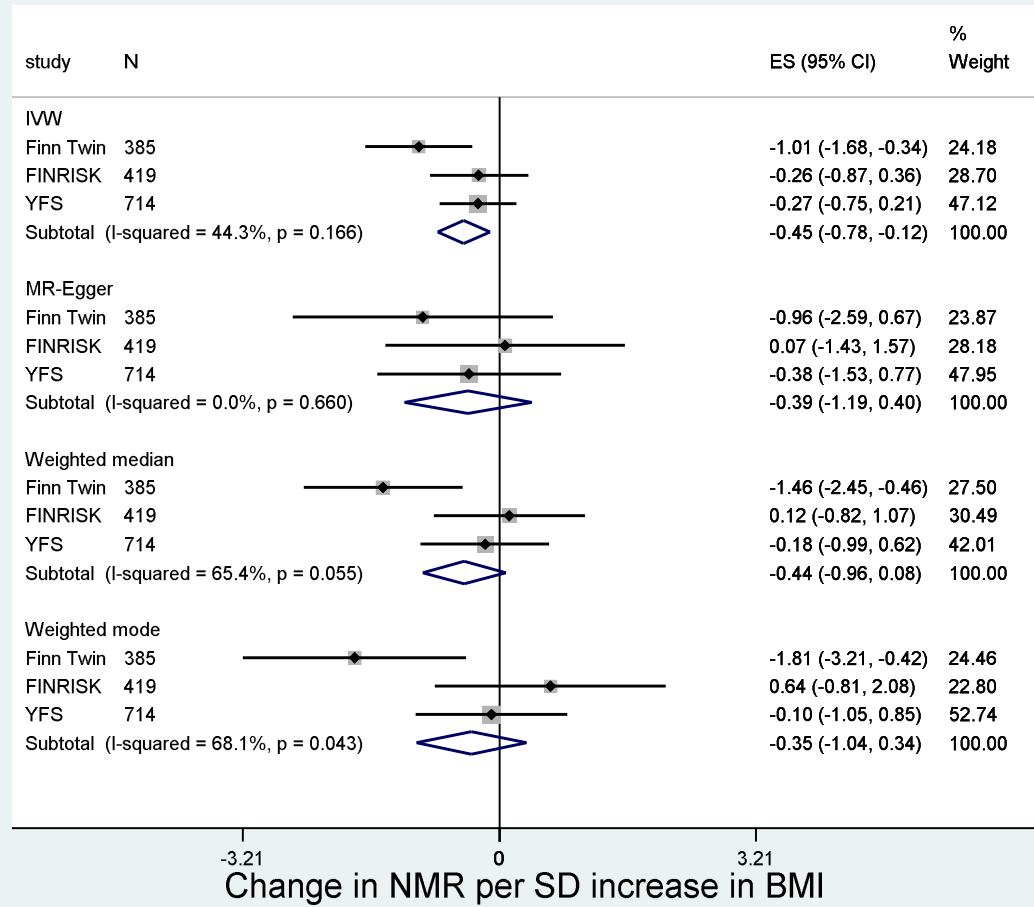

267

268 **MR analysis of the effect of smoking heaviness on BMI**

269 Consistent with previous studies [7, 8], the minor allele of the smoking heaviness related variant,  
 270 rs16969968, increased number of cigarettes smoked per day by 0.95 (95% CI: 0.79 to 1.11, N =  
 271 22,568) and decreased BMI in current (beta per minor allele: -0.21, 95% CI: -0.29 to -0.13, N =  
 272 32,685), but not former (beta per minor allele: 0.01, 95% CI: -0.03 to 0.05, N = 116,158) or never  
 273 smokers (beta per minor allele: 0.02, 95% CI: -0.02 to 0.05, N = 181,333, p for interaction between  
 274 smoking groups<0.001) in UK Biobank.

275

## Discussion

Using data from multiple cohorts, we found evidence that higher BMI increases the likelihood of becoming a smoker and increases smoking heaviness within current smokers. This finding was supported by the negative association between the BMI genetic risk score and *AHRR* methylation (which is hypomethylated among smokers). However, the BMI genetic risk score was not associated with cotinine levels and showed some evidence of a negative association with the nicotine metabolite ratio, which we might expect to reduce cigarette consumption [25]. In agreement with previous findings [7], we showed that heavier smoking lowers BMI. Taken together, these results suggest that there may be causal bidirectional associations between smoking phenotypes and BMI, and that these may act in opposing directions.

Our results for smoking initiation and cigarettes per day are similar to those presented by Thorgeirsson and colleagues, who used the TAG dataset but only 32 BMI-related genetic variants, from an earlier GWAS [28]. It is possible that, as they suggest, the effects observed here represent a shared genetic aetiology between BMI and smoking behaviour. However, our results for smoking initiation and cigarettes per day were supported by methods which are more robust to the pleiotropy assumption, MR-Egger, and weighted median and weighted mode MR, giving weight to the explanation that this finding represents a causal effect of BMI on smoking uptake and heaviness. This was supported by the negative association we observed between the BMI genetic risk score and DNA methylation at *AHRR*, given that smoking is associated with lower DNA methylation at *AHRR* [38]. Our finding could, in part, explain the positive association found between the BMI genetic risk score and certain types of lung cancer [45]. Although associations via smoking were ruled out in this analysis, sample sizes for testing associations with smoking behaviour were small.

We did not find clear evidence for an effect of BMI on cotinine levels, which might be expected if having higher BMI increases number of cigarettes smoked per day (and therefore total tobacco intake). It is possible that whilst BMI increases total tobacco intake and therefore absolute cotinine

levels, individuals with higher BMI have lower blood cotinine concentration due to higher total blood volume (meaning that cotinine is more diluted in the blood) or greater absorption of cotinine by adipose tissue [23]. These opposing effects could lead to a negligible net effect of BMI on cotinine levels.

We observed some evidence for a causal negative effect of BMI on the nicotine metabolite ratio, although findings should be interpreted with caution as they were very heterogeneous between studies. Although this does not rule out an effect of NMR on BMI mediated through higher tobacco intake, our data provide some support for BMI lowering NMR, the direction hypothesised by Chenoweth and colleagues [27]. Given that it is unlikely that BMI affects plasma cotinine and 3-hydroxycotinine differentially, this could point to an effect of BMI on the enzymes which metabolise these compounds or to indirect effects of BMI via other factors which may affect NMR (e.g. alcohol consumption, hormone levels) [27]. Our findings in relation to NMR demonstrate the potential complexity of the BMI- smoking relationship, with opposing effects on behaviour and metabolism. However, an overall positive effect of BMI on tobacco consumption implies that individuals with higher BMI are still at higher risk of increased tobacco consumption (and therefore the harmful effects of tobacco smoke), even if having higher BMI may reduce levels of metabolites.

Although we have attempted to explore both behaviour and metabolism in our analyses, it is not clear what the mechanisms underlying the association between higher BMI and smoking initiation and cigarette consumption are. If this is due to individuals with higher BMI having greater concerns about weight control, we might also expect to observe evidence for a causal effect with smoking cessation as fear of weight gain is often provided as a reason for continuing to smoke [10].

Importantly, interventions which incorporate weight gain concerns or which aim to tackle weight gain at the same time as smoking cessation may still be effective as weight concerns are not always strongly correlated with or may have non-linear relationships with BMI [19]. Given that there is evidence that higher BMI is causally related to lower socioeconomic status, income and educational

attainment [46] and that lower educational attainment causes increased smoking [47, 48] it is possible that any effect of BMI on smoking could be via these sociodemographic factors.

There are several limitations to this analysis. Firstly, there is sample overlap between the BMI GWAS and the smoking, cotinine, NMR and GWA studies (estimated to be up to 17%), which may have biased the results of our two sample Mendelian Randomization analyses in the direction of the observational estimates [49]. However, results for smoking behaviour from UK Biobank (which was not included in the BMI GWAS) were highly consistent with those from TAG, suggesting that these results were not driven by bias due to participant overlap. We also repeated the TAG, cotinine and NMR analyses using beta coefficients and standard errors for BMI generated in UK Biobank and these were similar (data not shown). Secondly, we were unable to test associations of the BMI genetic risk score with BMI in the outcome datasets in the two sample MR. We found some evidence that the association of the BMI genetic risk score with BMI is stronger in current than in former or never smokers in UK Biobank. Therefore effect sizes should be treated with some caution.

In conclusion, our findings support of a bidirectional association between BMI and smoking behaviour. Higher BMI leads to increased likelihood of smoking and greater tobacco consumption, but smoking also serves to reduce BMI. Given that BMI and smoking are both major risk factors for disease, this bidirectional causal relationship highlights the need to consider both of these together in prevention strategies. If having higher BMI does increase smoking, interventions aimed at reducing BMI may also help to prevent smoking uptake.

## 350     **Acknowledgements**

351     We are extremely grateful to all the families who took part in this study, the midwives for their help  
352     in recruiting them, and the whole ALSPAC team, which includes interviewers, computer and  
353     laboratory technicians, clerical workers, research scientists, volunteers, managers, receptionists and  
354     nurses. The UK Medical Research Council and Wellcome (Grant ref: 102215/2/13/2) and the  
355     University of Bristol provide core support for ALSPAC. This publication is the work of the authors and  
356     Amy Taylor and Marcus Munafò will serve as guarantors for the contents of this paper. MRM is a  
357     member of the UK Centre for Tobacco Control Studies, a UKCRC Public Health Research: Centre of  
358     Excellence. Funding from British Heart Foundation, Cancer Research UK, Economic and Social  
359     Research Council, Medical Research Council, and the National Institute for Health Research, under  
360     the auspices of the UK Clinical Research Collaboration, is gratefully acknowledged. This work was  
361     supported by the Medical Research Council (MC\_UU\_12013/1, MC\_UU\_12013/2,  
362     MC\_UU\_12013/6), the NIHR Biomedical Centre at the University Hospitals Bristol NHS Foundation  
363     Trust and Cancer Research UK (C18281/A19169 and C57854/A22171) The views expressed in this  
364     paper are those of the authors and not necessarily the MRC, Wellcome, NIHR or any other funders.



- 366 1. Global Health Risks. 2009.
- 367 2. Audrain-McGovern J, Benowitz NL. Cigarette smoking, nicotine, and body weight. *Clinical*  
368 *pharmacology and therapeutics*. 2011;90(1):164-8. doi: 10.1038/clpt.2011.105. PubMed PMID:  
369 21633341; PubMed Central PMCID: PMCPMC3195407.
- 370 3. Dare S, Mackay DF, Pell JP. Relationship between smoking and obesity: a cross-sectional  
371 study of 499,504 middle-aged adults in the UK general population. *PloS one*. 2015;10(4):e0123579.  
372 doi: 10.1371/journal.pone.0123579. PubMed PMID: 25886648; PubMed Central PMCID:  
373 PMCPMC4401671.
- 374 4. Ma J, Betts NM, Hampl JS. Clustering of lifestyle behaviors: the relationship between  
375 cigarette smoking, alcohol consumption, and dietary intake. *American journal of health promotion* :  
376 *AJHP*. 2000;15(2):107-17. PubMed PMID: 11194694.
- 377 5. Heaton CG, Vallone D, McCausland KL, Xiao H, Green MP. Smoking, obesity, and their co-  
378 occurrence in the United States: cross sectional analysis. *Bmj*. 2006;333(7557):25-6. doi:  
379 10.1136/bmj.38840.608704.80. PubMed PMID: 16698804; PubMed Central PMCID:  
380 PMCPMC1488756.
- 381 6. Davey Smith G, Ebrahim S. 'Mendelian randomization': can genetic epidemiology contribute  
382 to understanding environmental determinants of disease? *International journal of epidemiology*.  
383 2003;32(1):1-22. Epub 2003/04/12. PubMed PMID: 12689998.
- 384 7. Freathy RM, Kazeem GR, Morris RW, Johnson PC, Paternoster L, Ebrahim S, et al. Genetic  
385 variation at CHRNA5-CHRNA3-CHRNA4 interacts with smoking status to influence body mass index.  
386 *International journal of epidemiology*. 2011;40(6):1617-28. Epub 2011/05/20. doi:  
387 10.1093/ije/dyr077. PubMed PMID: 21593077; PubMed Central PMCID: PMC3235017.
- 388 8. Asvold BO, Bjorngaard JH, Carslake D, Gabrielsen ME, Skorpen F, Davey Smith G, et al. Causal  
389 associations of tobacco smoking with cardiovascular risk factors: a Mendelian randomization analysis  
390 of the HUNT Study in Norway. *International journal of epidemiology*. 2014. doi: 10.1093/ije/dyu113.  
391 PubMed PMID: 24867305.
- 392 9. Morris RW, Taylor AE, Fluharty ME, Bjorngaard JH, Asvold BO, Elvestad Gabrielsen M, et al.  
393 Heavier smoking may lead to a relative increase in waist circumference: evidence for a causal  
394 relationship from a Mendelian randomisation meta-analysis. *The CARTA consortium. BMJ open*.  
395 2015;5(8):e008808. doi: 10.1136/bmjopen-2015-008808. PubMed PMID: 26264275; PubMed Central  
396 PMCID: PMC4538266.
- 397 10. Farley AC, Hajek P, Lycett D, Aveyard P. Interventions for preventing weight gain after  
398 smoking cessation. *Cochrane database of systematic reviews*. 2012;1:CD006219. doi:  
399 10.1002/14651858.CD006219.pub3. PubMed PMID: 22258966.
- 400 11. Jain P, Danaei G, Robins JM, Manson JE, Hernan MA. Smoking cessation and long-term  
401 weight gain in the Framingham Heart Study: an application of the parametric g-formula for a  
402 continuous outcome. *European journal of epidemiology*. 2016;31(12):1223-9. PubMed PMID:  
403 WOS:000392302800007.
- 404 12. Filozof C, Fernandez Pinilla MC, Fernandez-Cruz A. Smoking cessation and weight gain.  
405 *Obesity reviews* : an official journal of the International Association for the Study of Obesity.  
406 2004;5(2):95-103. doi: 10.1111/j.1467-789X.2004.00131.x. PubMed PMID: 15086863.
- 407 13. Aveyard P, Lycett D, Farley A. Managing smoking cessation-related weight gain. *Pol Arch*  
408 *Med Wewn*. 2012;122(10):494-8. PubMed PMID: WOS:000310575200006.
- 409 14. Yang M, Chen H, Johnson ML, Essien EJ, Peters RJ, Wang X, et al. Comparative Effectiveness  
410 of Smoking Cessation Medications to Attenuate Weight Gain Following Cessation. *Substance Use &*  
411 *Misuse*. 2016;51(5):586-97. PubMed PMID: WOS:000374658300005.
- 412 15. Smith GD, Bracha Y, Svendsen KH, Neaton JD, Haffner SM, Kuller LH, et al. Incidence of type  
413 2 diabetes in the randomized multiple risk factor intervention trial. *Annals of internal medicine*.  
414 2005;142(5):313-22. PubMed PMID: WOS:000227325100001.



16. Clark MM, Decker PA, Offord KP, Patten CA, Vickers KS, Croghan IT, et al. Weight concerns among male smokers. *Addictive behaviors*. 2004;29(8):1637-41. doi: 10.1016/j.addbeh.2004.02.034. PubMed PMID: 15451131.
17. Winter AL, de Guia NA, Ferrence R, Cohen JE. The relationship between body weight perceptions, weight control behaviours and smoking status among adolescents. *Canadian journal of public health Revue canadienne de sante publique*. 2002;93(5):362-5. PubMed PMID: 12353458.
18. Tomeo CA, Field AE, Berkey CS, Colditz GA, Frazier AL. Weight concerns, weight control behaviors, and smoking initiation. *Pediatrics*. 1999;104(4 Pt 1):918-24. PubMed PMID: 10506235.
19. Calzo JP, Sonnevile KR, Haines J, Blood EA, Field AE, Austin SB. The development of associations among body mass index, body dissatisfaction, and weight and shape concern in adolescent boys and girls. *The Journal of adolescent health : official publication of the Society for Adolescent Medicine*. 2012;51(5):517-23. doi: 10.1016/j.jadohealth.2012.02.021. PubMed PMID: 23084175; PubMed Central PMCID: PMC3479441.
20. Howe LJ, Trela-Larsen L, Taylor M, Heron J, Munafo MR, Taylor AE. Body mass index, body dissatisfaction and adolescent smoking initiation. *Drug and alcohol dependence*. 2017;178:143-9. doi: 10.1016/j.drugalcdep.2017.04.008. PubMed PMID: 28647682.
21. Strine TW, Mokdad AH, Dube SR, Balluz LS, Gonzalez O, Berry JT, et al. The association of depression and anxiety with obesity and unhealthy behaviors among community-dwelling US adults. *General hospital psychiatry*. 2008;30(2):127-37. Epub 2008/02/23. doi: 10.1016/j.genhosppsych.2007.12.008. PubMed PMID: 18291294.
22. van den broek N, Treur JL, Larsen JK, Verhagen M, Verweij KJH, Vink J. Causal Associations Between Body Mass Index and Mental Health: AMendelian Randomization Study bioRxiv 2017.
23. Jain RB, Bernert JT. Effect of body mass index and total blood volume on serum cotinine levels among cigarette smokers: NHANES 1999-2008. *Clin Chim Acta*. 2010;411(15-16):1063-8. doi: 10.1016/j.cca.2010.03.040. PubMed PMID: 20361952.
24. Prather RD, Tu TG, Rolf CN, Gorsline J. Nicotine pharmacokinetics of Nicoderm (nicotine transdermal system) in women and obese men compared with normal-sized men. *J Clin Pharmacol*. 1993;33(7):644-9. PubMed PMID: 8366189.
25. Chenoweth MJ, Schnoll RA, Novalen M, Hawk LW, Jr., George TP, Cinciripini PM, et al. The Nicotine Metabolite Ratio is Associated With Early Smoking Abstinence Even After Controlling for Factors That Influence the Nicotine Metabolite Ratio. *Nicotine & tobacco research : official journal of the Society for Research on Nicotine and Tobacco*. 2016;18(4):491-5. doi: 10.1093/ntr/ntv125. PubMed PMID: 26069034.
26. Chenoweth MJ, O'Loughlin J, Sylvestre MP, Tyndale RF. CYP2A6 slow nicotine metabolism is associated with increased quitting by adolescent smokers. *Pharmacogenetics and genomics*. 2013;23(4):232-5. doi: 10.1097/FPC.0b013e32835f834d. PubMed PMID: 23462429; PubMed Central PMCID: PMC3744214.
27. Chenoweth MJ, Novalen M, Hawk LW, Jr., Schnoll RA, George TP, Cinciripini PM, et al. Known and novel sources of variability in the nicotine metabolite ratio in a large sample of treatment-seeking smokers. *Cancer epidemiology, biomarkers & prevention : a publication of the American Association for Cancer Research, cosponsored by the American Society of Preventive Oncology*. 2014;23(9):1773-82. Epub 2014/07/12. doi: 10.1158/1055-9965.EPI-14-0427. PubMed PMID: 25012994; PubMed Central PMCID: PMC34154993.
28. Thorgeirsson TE, Gudbjartsson DF, Sulem P, Besenbacher S, Styrkarsdottir U, Thorleifsson G, et al. A common biological basis of obesity and nicotine addiction. *Translational psychiatry*. 2013;3:e308. doi: 10.1038/tp.2013.81. PubMed PMID: 24084939; PubMed Central PMCID: PMC3818010.
29. Furberg H, Kim Y, Dackor J, Boerwinkle E, Franceschini N, Ardissino D, et al. Genome-wide meta-analyses identify multiple loci associated with smoking behavior. *Nature genetics*. 2010;42(5):441-U134. doi: Doi 10.1038/Ng.571. PubMed PMID: ISI:000277179500017.

30. Locke AE, Kahali B, Berndt SI, Justice AE, Pers TH, Day FR, et al. Genetic studies of body mass index yield new insights for obesity biology. *Nature*. 2015;518(7538):197-206. doi: 10.1038/nature14177. PubMed PMID: 25673413; PubMed Central PMCID: PMC4382211.

31. Bowden J, Davey Smith G, Burgess S. Mendelian randomization with invalid instruments: effect estimation and bias detection through Egger regression. *International journal of epidemiology*. 2015;44(2):512-25. doi: 10.1093/ije/dyv080. PubMed PMID: 26050253.

32. Bowden J, Davey Smith G, Haycock PC, Burgess S. Consistent Estimation in Mendelian Randomization with Some Invalid Instruments Using a Weighted Median Estimator. *Genetic epidemiology*. 2016;40(4):304-14. doi: 10.1002/gepi.21965. PubMed PMID: 27061298; PubMed Central PMCID: PMC4849733.

33. Hartwig FP, Davey Smith G, Bowden J. Robust inference in summary data Mendelian randomization via the zero modal pleiotropy assumption. *International journal of epidemiology*. 2017;46(6):1985-98. Epub 2017/10/19. doi: 10.1093/ije/dyx102. PubMed PMID: 29040600.

34. Ware JJ, Chen X, Vink J, Loukola A, Minica C, Pool R, et al. Genome-Wide Meta-Analysis of Cotinine Levels in Cigarette Smokers Identifies Locus at 4q13.2. *Sci Rep*. 2016;6:20092. doi: 10.1038/srep20092. PubMed PMID: 26833182; PubMed Central PMCID: PMC4735517.

35. Loukola A, Buchwald J, Gupta R, Palviainen T, Hallfors J, Tikkanen E, et al. A Genome-Wide Association Study of a Biomarker of Nicotine Metabolism. *PLoS genetics*. 2015;11(9):e1005498. Epub 2015/09/26. doi: 10.1371/journal.pgen.1005498. PubMed PMID: 26407342; PubMed Central PMCID: PMC4583245.

36. Allen NE, Sudlow C, Peakman T, Collins R, Biobank UK. UK biobank data: come and get it. *Sci Transl Med*. 2014;6(224):224ed4. Epub 2014/02/21. doi: 10.1126/scitranslmed.3008601. PubMed PMID: 24553384.

37. Fraser A, Macdonald-Wallis C, Tilling K, Boyd A, Golding J, Davey Smith G, et al. Cohort Profile: The Avon Longitudinal Study of Parents and Children: ALSPAC mothers cohort. *International journal of epidemiology*. 2013;42(1):97-110. Epub 2012/04/18. doi: 10.1093/ije/dys066. PubMed PMID: 22507742; PubMed Central PMCID: PMC3600619.

38. Zeilinger S, Kuhnel B, Klopp N, Baurecht H, Kleinschmidt A, Gieger C, et al. Tobacco Smoking Leads to Extensive Genome-Wide Changes in DNA Methylation. *PloS one*. 2013;8(5). doi: ARTN e63812. 10.1371/journal.pone.0063812. PubMed PMID: WOS:000319107900061.

39. Relton CL, Gaunt T, McArdle W, Ho K, Duggirala A, Shihab H, et al. Data Resource Profile: Accessible Resource for Integrated Epigenomic Studies (ARIES). *International journal of epidemiology*. 2015;44(4):1181-90. doi: 10.1093/ije/dyv072. PubMed PMID: 25991711.

40. Boyd A, Golding J, Macleod J, Lawlor DA, Fraser A, Henderson J, et al. Cohort Profile: The 'Children of the 90s'--the index offspring of the Avon Longitudinal Study of Parents and Children. *International journal of epidemiology*. 2013;42(1):111-27. Epub 2012/04/18. doi: 10.1093/ije/dys064. PubMed PMID: 22507743; PubMed Central PMCID: PMC3600618.

41. Collins R. What makes UK Biobank special? *Lancet*. 2012;379(9822):1173-4. doi: 10.1016/S0140-6736(12)60404-8. PubMed PMID: 22463865.

42. Burgess S, Scott RA, Timpson NJ, Davey Smith G, Thompson SG, Consortium E-I. Using published data in Mendelian randomization: a blueprint for efficient identification of causal risk factors. *European journal of epidemiology*. 2015. doi: 10.1007/s10654-015-0011-z. PubMed PMID: 25773750.

43. Spiller W, Davies NM, TM P. Software Application Profile: mrrobust - A Tool For Performing Two-Sample Summary Mendelian Randomization Analyses. *BioRxiv*. 2017.

44. Ware JJ, van den Bree MB, Munafò MR. Association of the CHRNA5-A3-B4 gene cluster with heaviness of smoking: a meta-analysis. *Nicotine & tobacco research : official journal of the Society for Research on Nicotine and Tobacco*. 2011;13(12):1167-75. Epub 2011/11/11. doi: 10.1093/ntr/ntr118. PubMed PMID: 22071378; PubMed Central PMCID: PMC3223575.

- 515 45. Carreras-Torres R, Haycock PC, Relton CL, Martin RM, Smith GD, Kraft P, et al. The causal  
516 relevance of body mass index in different histological types of lung cancer: A Mendelian  
517 randomization study. *Sci Rep.* 2016;6:31121. Epub 2016/08/05. doi: 10.1038/srep31121. PubMed  
518 PMID: 27487993; PubMed Central PMCID: PMC4973233.
- 519 46. Tyrrell J, Jones SE, Beaumont R, Astley C, Lovell R, Yaghootkar H, et al. Higher BMI Leads to  
520 Lower Socioeconomic Status: A Mendelian Randomisation Study in the UK Biobank. *Diabetes.*  
521 2016;65:A431-A. PubMed PMID: WOS:000398372802274.
- 522 47. Gage SH, Bowden J, Davey Smith G, Munafò M. Investigating causality in associations  
523 between education and smoking: A two-sample Mendelian randomization study. *BioRxiv.* 2017.
- 524 48. Tillmann T, Vaucher J, Okbay A, Pikhart H, Peasey A, Kubinova R, et al. Education and  
525 coronary heart disease: mendelian randomisation study. *Bmj.* 2017;358:j3542. Epub 2017/09/01.  
526 doi: 10.1136/bmj.j3542. PubMed PMID: 28855160; PubMed Central PMCID: PMC5594424 at  
527 [www.icmje.org/coi\\_disclosure.pdf](http://www.icmje.org/coi_disclosure.pdf) and declare: support for the submitted work as detailed above;  
528 no financial relationships with any organisations that might have an interest in the submitted work  
529 in the previous three years; no other relationships or activities that could appear to have influenced  
530 the submitted work.
- 531 49. Burgess S, Davies NM, Thompson SG. Bias due to participant overlap in two-sample  
532 Mendelian randomization. *Genetic epidemiology.* 2016;40(7):597-608. Epub 2016/10/19. doi:  
533 10.1002/gepi.21998. PubMed PMID: 27625185; PubMed Central PMCID: PMC5082560.

534
